# Supplementary material
Source: PubMed Central journal article supplement (PMC5033925)
Supplement: jciinsight-1-84897-s001.pdf [file jciinsight-1-84897-s001.pdf]

**Supplemental Table 1. Cardiac mitochondrial acetyl proteoforms in mouse heart.**

| <b>Uniprot ID</b> | <b>Gene Symbol</b> | <b>Acetyl Proteoform</b> |
|-------------------|--------------------|--------------------------|
| Q8BWT1            | <i>Acaa2</i>       | K137                     |
| Q8BWT1            | <i>Acaa2</i>       | K171                     |
| Q8BWT1            | <i>Acaa2</i>       | K234                     |
| Q8BWT1            | <i>Acaa2</i>       | K240                     |
| D3Z7X0            | <i>Acad12</i>      | K334                     |
| Q8JZN5            | <i>Acad9</i>       | K206                     |
| P51174            | <i>Acadl</i>       | K156                     |
| P51174            | <i>Acadl</i>       | K419                     |
| P50544            | <i>Acadvl</i>      | K122                     |
| P50544            | <i>Acadvl</i>      | K201                     |
| P50544            | <i>Acadvl</i>      | K240                     |
| P50544            | <i>Acadvl</i>      | K279                     |
| P50544            | <i>Acadvl</i>      | K52                      |
| Q8QZT1            | <i>Acat1</i>       | K171                     |
| Q8QZT1            | <i>Acat1</i>       | K187                     |
| Q8QZT1            | <i>Acat1</i>       | K220                     |
| Q8QZT1            | <i>Acat1</i>       | K242                     |
| Q8QZT1            | <i>Acat1</i>       | K248                     |
| Q8QZT1            | <i>Acat1</i>       | K304                     |
| Q8QZT1            | <i>Acat1</i>       | K335                     |
| Q8QZT1            | <i>Acat1</i>       | K340                     |
| Q8QZT1            | <i>Acat1</i>       | K80                      |
| Q99KI0            | <i>Aco2</i>        | K50                      |
| Q99KI0            | <i>Aco2</i>        | K517                     |
| Q99KI0            | <i>Aco2</i>        | K517 K520                |
| Q99KI0            | <i>Aco2</i>        | K521                     |
| Q99KI0            | <i>Aco2</i>        | K523                     |
| Q99KI0            | <i>Aco2</i>        | K689                     |
| Q99KI0            | <i>Aco2</i>        | K723                     |
| Q99KI0            | <i>Aco2</i>        | K736                     |
| Q99KI0            | <i>Aco2</i>        | K739                     |
| Q9CQR4            | <i>Acot13</i>      | K127                     |
| Q9CQR4            | <i>Acot13</i>      | K27                      |
| Q9CQR4            | <i>Acot13</i>      | K37                      |
| Q9CQR4            | <i>Acot13</i>      | K43                      |
| Q9WTP7            | <i>Ak3</i>         | K29                      |
| Q8CG76            | <i>Akr7a2</i>      | K123                     |
| Q8CHT0            | <i>Aldh4a1</i>     | K54                      |
| Q8CHT0            | <i>Aldh4a1</i>     | K92                      |
| Q9EQ20            | <i>Aldh6a1</i>     | K117                     |
| Q9EQ20            | <i>Aldh6a1</i>     | K47                      |
| Q925I1            | <i>Atad3</i>       | K494                     |
| Q03265            | <i>Atp5a1</i>      | K126                     |
| Q03265            | <i>Atp5a1</i>      | K239                     |
| Q03265            | <i>Atp5a1</i>      | K498                     |
| Q03265            | <i>Atp5a1</i>      | K531                     |
| Q03265            | <i>Atp5a1</i>      | K539                     |
| P56480            | <i>Atp5b</i>       | K133                     |
| P56480            | <i>Atp5b</i>       | K485                     |
| P56480            | <i>Atp5b</i>       | K522                     |
| Q9DCX2            | <i>Atp5h</i>       | K117                     |

|        |                  |         |
|--------|------------------|---------|
| Q9DCX2 | <i>Atp5h</i>     | K48     |
| Q9DCX2 | <i>Atp5h</i>     | K63     |
| Q9DCX2 | <i>Atp5h</i>     | K63 K72 |
| Q9DCX2 | <i>Atp5h</i>     | K72     |
| Q9DCX2 | <i>Atp5h</i>     | K78     |
| Q9DCX2 | <i>Atp5h</i>     | K85     |
| Q9DCX2 | <i>Atp5h</i>     | K95     |
| Q06185 | <i>Atp5i</i>     | K34     |
| Q06185 | <i>Atp5i</i>     | K48     |
| P97450 | <i>Atp5j</i>     | K105    |
| P97450 | <i>Atp5j</i>     | K41     |
| P97450 | <i>Atp5j</i>     | K46     |
| P97450 | <i>Atp5j</i>     | K99     |
| Q9DB20 | <i>Atp5o</i>     | K162    |
| Q9DB20 | <i>Atp5o</i>     | K192    |
| Q9DB20 | <i>Atp5o</i>     | K53     |
| Q9DB20 | <i>Atp5o</i>     | K60     |
| Q9DB20 | <i>Atp5o</i>     | K70     |
| Q9DB20 | <i>Atp5o</i>     | K84     |
| Q9JLZ3 | <i>Auh</i>       | K80     |
| Q91VT4 | <i>Cbr4</i>      | K151    |
| Q91WS0 | <i>Cisd1</i>     | K68     |
| Q6P8J7 | <i>Ckmt2</i>     | K292    |
| Q6P8J7 | <i>Ckmt2</i>     | K344    |
| Q8R4N0 | <i>Clybl</i>     | K55     |
| Q8R4N0 | <i>Clybl</i>     | K80     |
| Q8R4N0 | <i>Clybl</i>     | K90     |
| P19783 | <i>Cox4i1</i>    | K164    |
| P19783 | <i>Cox4i1</i>    | K67     |
| P19783 | <i>Cox4i1</i>    | K78     |
| P12787 | <i>Cox5a</i>     | K109    |
| P56391 | <i>Cox6b1</i>    | K85     |
| P56392 | <i>Cox7a1</i>    | K31     |
| P56393 | <i>Cox7b</i>     | K75     |
| P17665 | <i>Cox7c</i>     | K25     |
| Q9CZU6 | <i>Cs</i>        | K321    |
| Q9CZU6 | <i>Cs</i>        | K327    |
| Q9CZU6 | <i>Cs</i>        | K370    |
| Q9CZU6 | <i>Cs</i>        | K52     |
| Q9D172 | <i>D10Jhu81e</i> | K162    |
| Q9D172 | <i>D10Jhu81e</i> | K201    |
| Q9D172 | <i>D10Jhu81e</i> | K231    |
| Q9CQ62 | <i>Decr1</i>     | K185    |
| Q9CQ62 | <i>Decr1</i>     | K42     |
| Q8BMF4 | <i>Dlat</i>      | K632    |
| O08749 | <i>Dld</i>       | K104    |
| O08749 | <i>Dld</i>       | K143    |
| O08749 | <i>Dld</i>       | K155    |
| O08749 | <i>Dld</i>       | K271    |
| O08749 | <i>Dld</i>       | K273    |
| O08749 | <i>Dld</i>       | K410    |
| O08749 | <i>Dld</i>       | K420    |
| O08749 | <i>Dld</i>       | K66     |

|        |               |           |
|--------|---------------|-----------|
| Q9D2G2 | <i>Dlst</i>   | K268      |
| Q9D2G2 | <i>Dlst</i>   | K268 K273 |
| Q9D2G2 | <i>Dlst</i>   | K273      |
| Q9D2G2 | <i>Dlst</i>   | K278      |
| O35459 | <i>Echl</i>   | K97       |
| Q8BH95 | <i>Echs1</i>  | K101      |
| P42125 | <i>Eci1</i>   | K222      |
| P42125 | <i>Eci1</i>   | K229      |
| P42125 | <i>Eci1</i>   | K76       |
| Q99LC5 | <i>Etfa</i>   | K162      |
| Q99LC5 | <i>Etfa</i>   | K164      |
| Q99LC5 | <i>Etfa</i>   | K69       |
| Q99LC5 | <i>Etfa</i>   | K75       |
| Q9DCW4 | <i>Etfb</i>   | K110      |
| Q9DCW4 | <i>Etfb</i>   | K114      |
| P26443 | <i>Glud1</i>  | K415      |
| P26443 | <i>Glud1</i>  | K503      |
| P26443 | <i>Glud1</i>  | K84       |
| P05202 | <i>Got2</i>   | K122      |
| P05202 | <i>Got2</i>   | K296      |
| P05202 | <i>Got2</i>   | K302      |
| P05202 | <i>Got2</i>   | K309      |
| P05202 | <i>Got2</i>   | K363      |
| P05202 | <i>Got2</i>   | K396      |
| P05202 | <i>Got2</i>   | K404      |
| P05202 | <i>Got2</i>   | K73       |
| P05202 | <i>Got2</i>   | K90       |
| Q61425 | <i>Hadh</i>   | K127      |
| Q61425 | <i>Hadh</i>   | K185      |
| Q61425 | <i>Hadh</i>   | K192      |
| Q61425 | <i>Hadh</i>   | K212      |
| Q61425 | <i>Hadh</i>   | K241      |
| Q61425 | <i>Hadh</i>   | K75       |
| Q61425 | <i>Hadh</i>   | K81       |
| Q61425 | <i>Hadh</i>   | K87       |
| Q8BMS1 | <i>Hadha</i>  | K289      |
| Q8BMS1 | <i>Hadha</i>  | K334      |
| Q8BMS1 | <i>Hadha</i>  | K353      |
| Q8BMS1 | <i>Hadha</i>  | K386      |
| Q8BMS1 | <i>Hadha</i>  | K406      |
| Q8BMS1 | <i>Hadha</i>  | K519      |
| Q8BMS1 | <i>Hadha</i>  | K540      |
| Q8BMS1 | <i>Hadha</i>  | K569      |
| Q8BMS1 | <i>Hadha</i>  | K60       |
| Q8BMS1 | <i>Hadha</i>  | K728      |
| Q99JY0 | <i>Hadhb</i>  | K202      |
| Q99JY0 | <i>Hadhb</i>  | K273      |
| Q99JY0 | <i>Hadhb</i>  | K333      |
| Q99JY0 | <i>Hadhb</i>  | K73       |
| Q99L13 | <i>Hibadh</i> | K237      |
| Q99L13 | <i>Hibadh</i> | K94       |
| Q8QZS1 | <i>Hibch</i>  | K352      |
| P38647 | <i>Hspa9</i>  | K135      |

|        |               |           |
|--------|---------------|-----------|
| P38647 | <i>Hspa9</i>  | K288      |
| P38647 | <i>Hspa9</i>  | K300      |
| P38647 | <i>Hspa9</i>  | K612      |
| P38647 | <i>Hspa9</i>  | K76       |
| P63038 | <i>Hspd1</i>  | K125      |
| P63038 | <i>Hspd1</i>  | K130      |
| P63038 | <i>Hspd1</i>  | K202      |
| P63038 | <i>Hspd1</i>  | K455      |
| P63038 | <i>Hspd1</i>  | K87       |
| Q8BIJ6 | <i>Iars2</i>  | K725      |
| Q8CAK1 | <i>Iba57</i>  | K222      |
| P54071 | <i>Idh2</i>   | K106      |
| P54071 | <i>Idh2</i>   | K155      |
| P54071 | <i>Idh2</i>   | K166      |
| P54071 | <i>Idh2</i>   | K180      |
| P54071 | <i>Idh2</i>   | K199      |
| P54071 | <i>Idh2</i>   | K256      |
| P54071 | <i>Idh2</i>   | K272      |
| P54071 | <i>Idh2</i>   | K280      |
| P54071 | <i>Idh2</i>   | K384      |
| P54071 | <i>Idh2</i>   | K400      |
| P54071 | <i>Idh2</i>   | K48       |
| P54071 | <i>Idh2</i>   | K67       |
| Q9D6R2 | <i>Idh3a</i>  | K100      |
| Q9D6R2 | <i>Idh3a</i>  | K336      |
| Q9D6R2 | <i>Idh3a</i>  | K343      |
| Q9D6R2 | <i>Idh3a</i>  | K58       |
| Q9D6R2 | <i>Idh3a</i>  | K77       |
| Q9JHI5 | <i>Ivd</i>    | K76       |
| P14152 | <i>Mdh1</i>   | K107      |
| P14152 | <i>Mdh1</i>   | K164      |
| P08249 | <i>Mdh2</i>   | K165      |
| P08249 | <i>Mdh2</i>   | K185      |
| P08249 | <i>Mdh2</i>   | K239      |
| P08249 | <i>Mdh2</i>   | K296      |
| P08249 | <i>Mdh2</i>   | K301      |
| P08249 | <i>Mdh2</i>   | K307      |
| P08249 | <i>Mdh2</i>   | K328 K329 |
| Q9CQ75 | <i>Ndufa2</i> | K64       |
| Q62425 | <i>Ndufa4</i> | K56       |
| Q9CPP6 | <i>Ndufa5</i> | K36       |
| Q9CPP6 | <i>Ndufa5</i> | K40       |
| Q9CPP6 | <i>Ndufa5</i> | K60       |
| Q9CPP6 | <i>Ndufa5</i> | K66       |
| Q9DC69 | <i>Ndufa9</i> | K189      |
| Q9DC69 | <i>Ndufa9</i> | K254      |
| Q9D6J5 | <i>Ndufb8</i> | K176      |
| Q9CQJ8 | <i>Ndufb9</i> | K121      |
| Q9DCT2 | <i>Ndufs3</i> | K259      |
| P52503 | <i>Ndufs6</i> | K41       |
| Q9D6J6 | <i>Ndufv2</i> | K60       |
| Q60597 | <i>Ogdh</i>   | K897      |
| Q91ZA3 | <i>Pcca</i>   | K146      |

|        |                 |      |
|--------|-----------------|------|
| Q91ZA3 | <i>Pcca</i>     | K61  |
| P35486 | <i>Pdha1</i>    | K244 |
| P35486 | <i>Pdha1</i>    | K267 |
| P35486 | <i>Pdha1</i>    | K321 |
| P35486 | <i>Pdha1</i>    | K63  |
| P35486 | <i>Pdha1</i>    | K83  |
| Q8BKZ9 | <i>Pdhx</i>     | K321 |
| P20108 | <i>Prdx3</i>    | K254 |
| P20108 | <i>Prdx3</i>    | K92  |
| Q8K2B3 | <i>Sdha</i>     | K179 |
| Q8K2B3 | <i>Sdha</i>     | K480 |
| Q8K2B3 | <i>Sdha</i>     | K485 |
| Q8K2B3 | <i>Sdha</i>     | K498 |
| Q8K2B3 | <i>Sdha</i>     | K547 |
| Q8K2B3 | <i>Sdha</i>     | K550 |
| Q8K2B3 | <i>Sdha</i>     | K608 |
| Q9CQA3 | <i>Sdhb</i>     | K269 |
| Q9CQA3 | <i>Sdhb</i>     | K53  |
| Q9CQA3 | <i>Sdhb</i>     | K57  |
| Q8BH59 | <i>Slc25a12</i> | K578 |
| P51881 | <i>Slc25a5</i>  | K105 |
| P51881 | <i>Slc25a5</i>  | K155 |
| P09671 | <i>Sod2</i>     | K114 |
| P09671 | <i>Sod2</i>     | K122 |
| P09671 | <i>Sod2</i>     | K130 |
| P09671 | <i>Sod2</i>     | K221 |
| P09671 | <i>Sod2</i>     | K68  |
| Q9WUM5 | <i>Suclg1</i>   | K54  |
| Q8R1I1 | <i>Uqcr10</i>   | K59  |
| Q9DB77 | <i>Uqcr2</i>    | K92  |
| Q9CR68 | <i>Uqcrfs1</i>  | K172 |
| P99028 | <i>Uqcrh</i>    | K40  |
| P99028 | <i>Uqcrh</i>    | K83  |
| Q78IK2 | <i>Usmg5</i>    | K16  |

---

All identified mitochondrial acetylproteoforms are listed. Mitochondrial proteins were defined based on GOCC annotation in DAVID and MITOCARTA.

**Supplemental Table 2. Mitochondrial protein acetylation sites regulated in HF mice.**

| Uniprot ID                                 | Gene Symbol                     | Acetyl Proteoform | HF/Sham (FC) | SIRT3 Target | Regulated in CH |
|--------------------------------------------|---------------------------------|-------------------|--------------|--------------|-----------------|
| Q8BWT1                                     | <i>Acaa2</i>                    | K137              | 1.56         | No           | Yes             |
| D3Z7X0                                     | <i>Acad12</i>                   | K334              | 2.08         | No           | No              |
| P50544                                     | <i>Acadvl</i>                   | K52               | 1.91         | No           | No              |
| P50544                                     | <i>Acadvl</i>                   | K240              | 1.75         | Yes          | No              |
| Q8QZT1                                     | <i>Acat1</i>                    | K187              | 1.67         | No           | No              |
| Q99K10                                     | <i>Aco2</i>                     | K50               | 1.50         | No           | No              |
| Q32MW3 Q9R0X4                              | <i>Acot10 Acot9</i>             | K102              | 1.69         | Yes          | Yes             |
| Q9CQR4                                     | <i>Acot13</i>                   | K27               | 2.72         | No           | No              |
| Q9Z0X1 B1AU25                              | <i>Aifm1</i>                    | K592              | -1.66        | No           | Yes             |
| Q8CG76                                     | <i>Akr7a2</i>                   | K123              | 1.63         | No           | No              |
| P47738 Q3U9J7 <br>Q3U6I3 Q3UJW1 <br>Q3TVM2 | <i>Aldh2</i>                    | K370              | 1.53         | Yes          | Yes             |
| P56480                                     | <i>Atp5b</i>                    | K133              | 1.60         | Yes          | Yes             |
| Q9D3D9 Q9DCZ0 <br>Q9D0J2                   | <i>Atp5d</i>                    | K165              | -1.55        | No           | Yes             |
| Q8R4N0                                     | <i>Clybl</i>                    | K80               | 1.56         | Yes          | No              |
| Q8R4N0                                     | <i>Clybl</i>                    | K55               | 1.56         | Yes          | No              |
| P19783                                     | <i>Cox4i1</i>                   | K67               | 1.77         | No           | No              |
| P47934 H7BX88                              | <i>Crat</i>                     | K270              | 1.70         | No           | Yes             |
| Q9D172                                     | <i>D10Jhu81e</i>                | K231              | 1.79         | Yes          | No              |
| Q9D172                                     | <i>D10Jhu81e</i>                | K201              | 1.62         | Yes          | No              |
| Q9CQ62                                     | <i>Decr1</i>                    | K42               | 2.07         | Yes          | No              |
| Q8BH95                                     | <i>Echs1</i>                    | K101              | 1.55         | Yes          | No              |
| P21550                                     | <i>Eno3</i>                     | K28               | -2.43        | No           | No              |
| Q9DCW4                                     | <i>Etfb</i>                     | K114              | 1.77         | No           | No              |
| Q921G7 Q6PF96                              | <i>Etfdh</i>                    | K133              | 1.72         | No           | No              |
| Q61425                                     | <i>Hadh</i>                     | K87               | 1.60         | Yes          | No              |
| Q8BMS1                                     | <i>Hadha</i>                    | K406              | 1.68         | Yes          | No              |
| Q99JY0                                     | <i>Hadhb</i>                    | K73               | 1.92         | Yes          | Yes             |
| P38647                                     | <i>Hspa9</i>                    | K300              | 2.26         | No           | No              |
| P63038                                     | <i>Hspd1</i>                    | K455              | 2.66         | No           | Yes             |
| P63038                                     | <i>Hspd1</i>                    | K130              | 1.52         | Yes          | No              |
| P63038                                     | <i>Hspd1</i>                    | K125              | 1.51         | Yes          | No              |
| Q8CAK1                                     | <i>Iba57</i>                    | K222              | -2.87        | No           | No              |
| P54071                                     | <i>Idh2</i>                     | K67               | 2.78         | No           | No              |
| P54071                                     | <i>Idh2</i>                     | K272              | 1.56         | No           | No              |
| P54071                                     | <i>Idh2</i>                     | K106              | 1.56         | No           | No              |
| P08249                                     | <i>Mdh2</i>                     | K165              | 1.69         | No           | No              |
| P03930 A3R404 <br>Q5GA80                   | <i>Mtntp8 mt-<br/>Atp8 ATP8</i> | K48               | 1.69         | Yes          | No              |
| P09541 Q9CZ19 <br>A2A6Q8                   | <i>Myl4</i>                     | K140              | 1.66         | No           | No              |
| Q3UIU2 A2AP32                              | <i>Ndufb6</i>                   | K24               | 1.67         | No           | No              |
| Q9D6J5                                     | <i>Ndufb8</i>                   | K176              | -1.88        | No           | No              |
| P52503                                     | <i>Ndufs6</i>                   | K41               | 2.11         | No           | Yes             |
| Q8K2B3                                     | <i>Sdha</i>                     | K608              | 1.98         | No           | Yes             |

A fold-change cut-off of  $\pm 1.5$  was used for this analysis.

**Supplemental Table 3. Pathway analysis of mitochondrial proteins with regulated acetylation sites in murine HF.**

| <b>Ingenuity Canonical Pathways</b>                                       | <b># of genes regulated</b> | <b># of genes in pathway</b> | <b>p-value</b> | <b>Acetylated Proteins</b>                          |
|---------------------------------------------------------------------------|-----------------------------|------------------------------|----------------|-----------------------------------------------------|
| <b>Oxidative Phosphorylation/Electron Transport Chain</b>                 | <b>7</b>                    | <b>100</b>                   | 7.943E-10      | <b>SDHA,ATP5B,ATP5D,NDUFS6,NDUFB6,NDUFB8,COX4I1</b> |
| <b>Fatty Acid <math>\beta</math>-oxidation I</b>                          | <b>5</b>                    | <b>30</b>                    | 2.754E-09      | <b>HADHB,ECHS1,ACAA2,HADHA,HADH</b>                 |
| Glutaryl-CoA Degradation                                                  | 4                           | 11                           | 3.802E-09      | HADHB,ACAT1,HADHA,HADH                              |
| Isoleucine Degradation I                                                  | 4                           | 14                           | 1.148E-08      | HADHB,ECHS1,ACAT1,HADHA                             |
| Tryptophan Degradation III (Eukaryotic)                                   | 4                           | 20                           | 5.623E-08      | HADHB,ACAT1,HADHA,HADH                              |
| Ketolysis                                                                 | 3                           | 8                            | 3.715E-07      | HADHB,ACAT1,HADHA                                   |
| Ketogenesis                                                               | 3                           | 10                           | 7.943E-07      | HADHB,ACAT1,HADHA                                   |
| Mevalonate Pathway I                                                      | 3                           | 12                           | 1.445E-06      | HADHB,ACAT1,HADHA                                   |
| Superpathway of Geranylgeranyldiphosphate Biosynthesis I (via Mevalonate) | 3                           | 12                           | 3.631E-06      | HADHB,ACAT1,HADHA                                   |
| Valine Degradation I                                                      | 3                           | 18                           | 5.370E-06      | HADHB,ECHS1,HADHA                                   |
| <b>TCA Cycle II (Eukaryotic)</b>                                          | <b>3</b>                    | <b>22</b>                    | 8.710E-06      | <b>SDHA,ACO2,MDH2</b>                               |
| Superpathway of Cholesterol Biosynthesis                                  | 3                           | 27                           | 1.905E-05      | HADHB,ACAT1,HADHA                                   |
| Gluconeogenesis I                                                         | 2                           | 24                           | 8.318E-04      | ENO3,MDH2                                           |
| Phenylethylamine Degradation I                                            | 1                           | 4                            | 7.762E-03      | ALDH2                                               |
| Aspartate Degradation II                                                  | 1                           | 7                            | 1.148E-02      | MDH2                                                |
| LXR/RXR Activation                                                        | 2                           | 110                          | 1.950E-02      | ECHS1,HADH                                          |
| Phenylalanine Degradation IV (Mammalian, via Side Chain)                  | 1                           | 14                           | 2.512E-02      | ALDH2                                               |
| Histamine Degradation                                                     | 1                           | 12                           | 2.512E-02      | ALDH2                                               |
| Methylglyoxal Degradation III                                             | 1                           | 14                           | 2.692E-02      | AKR7A2                                              |
| Putrescine Degradation III                                                | 1                           | 16                           | 3.090E-02      | ALDH2                                               |
| Fatty Acid $\alpha$ -oxidation                                            | 1                           | 15                           | 3.090E-02      | ALDH2                                               |
| Oxidative Ethanol Degradation III                                         | 1                           | 15                           | 3.090E-02      | ALDH2                                               |
| Tryptophan Degradation X (Mammalian, via Tryptamine)                      | 1                           | 17                           | 3.236E-02      | ALDH2                                               |
| Aldosterone Signaling in Epithelial Cells                                 | 2                           | 148                          | 3.311E-02      | HSPA9,HSPD1                                         |
| Ethanol Degradation IV                                                    | 1                           | 17                           | 3.467E-02      | ALDH2                                               |
| Dopamine Degradation                                                      | 1                           | 20                           | 3.802E-02      | ALDH2                                               |
| Glycolysis I                                                              | 1                           | 23                           | 4.169E-02      | ENO3                                                |
| Tumoricidal Function of Hepatic Natural Killer Cells                      | 1                           | 22                           | 4.365E-02      | AIFM1                                               |

All significantly regulated pathways as identified by Ingenuity Pathway Analysis are listed. Major energy transduction pathways are shown in bold.

**Supplemental Table 4. Mitochondrial protein acetylation sites regulated in CH mice.**

| Uniprot ID      | Gene Symbol         | Proteoform | CH/Sham (FC) | SIRT3 Target | Regulated in HF |
|-----------------|---------------------|------------|--------------|--------------|-----------------|
| Q8BWT1          | <i>Acaa2</i>        | K137       | 1.59         | No           | Yes             |
| Q8QZT1          | <i>Acat1</i>        | K80        | -1.50        | No           | No              |
| Q8QZT1          | <i>Acat1</i>        | K171       | -1.65        | No           | No              |
| Q99KI0          | <i>Aco2</i>         | K739       | -1.60        | Yes          | No              |
| Q32MW3 Q9R0X4   | <i>Acot10 Acot9</i> | K102       | 1.50         | Yes          | Yes             |
| Q9Z0X1 B1AU25   | <i>Aifm1</i>        | K592       | -2.08        | No           | Yes             |
| P47738 Q3U9J7   | <i>Aldh2</i>        | K370       | 1.61         | Yes          | Yes             |
| Q3U6I3 Q3UJW1   |                     |            |              |              |                 |
| Q3TVM2          |                     |            |              |              |                 |
| Q03265          | <i>Atp5a1</i>       | K126       | -1.54        | Yes          | No              |
| P56480          | <i>Atp5b</i>        | K133       | 1.96         | Yes          | Yes             |
| Q9D3D9 Q9DCZ0   | <i>Atp5d</i>        | K165       | 1.75         | No           | Yes             |
| Q9D0J2          |                     |            |              |              |                 |
| Q9DCX2          | <i>Atp5h</i>        | K48        | 1.77         | No           | No              |
| P97450          | <i>Atp5j</i>        | K99        | -1.64        | No           | No              |
| P97450          | <i>Atp5j</i>        | K41        | -1.66        | No           | No              |
| Q6P8J7          | <i>Ckmt2</i>        | K292       | 1.63         | No           | No              |
| P19536 Q9D881   | <i>Cox5b</i>        | K74        | 1.67         | No           | No              |
| P19536 Q9D881   | <i>Cox5b</i>        | K121       | 1.64         | No           | No              |
| P56393          | <i>Cox7b</i>        | K75        | 1.85         | No           | No              |
| P47934 H7BX88   | <i>Crat</i>         | K270       | 2.04         | No           | Yes             |
| Q9D0M3 Q9D0M3-2 | <i>Cycl</i>         | K177       | -1.98        | No           | No              |
| O08749          | <i>Dld</i>          | K420       | 1.79         | No           | No              |
| Q9D2G2          | <i>Dlst</i>         | K278       | -1.63        | No           | No              |
| O35459          | <i>Ech1</i>         | K97        | 1.69         | No           | No              |
| P42125          | <i>Eci1</i>         | K222       | -2.12        | No           | No              |
| Q9WUR2 Q9WUR2-2 | <i>Eci2</i>         | K138       | 3.39         | No           | No              |
| Q3TCD4          |                     |            |              |              |                 |
| Q99LC5          | <i>Etfp</i>         | K164       | 1.54         | No           | No              |
| P26443          | <i>Glud1</i>        | K415       | 2.35         | No           | No              |
| P26443          | <i>Glud1</i>        | K84        | -1.82        | No           | No              |
| P05202          | <i>Got2</i>         | K122       | 1.74         | No           | No              |
| Q61425          | <i>Hadh</i>         | K127       | 1.52         | No           | No              |
| Q8BMS1          | <i>Hadha</i>        | K334       | 1.58         | Yes          | No              |
| Q8BMS1          | <i>Hadha</i>        | K519       | 1.54         | No           | No              |
| Q99JY0          | <i>Hadhb</i>        | K73        | -1.64        | Yes          | Yes             |
| P63038          | <i>Hspd1</i>        | K455       | 2.46         | No           | Yes             |
| P54071          | <i>Idh2</i>         | K400       | 2.32         | No           | No              |
| Q9D6R2          | <i>Idh3a</i>        | K336       | -1.57        | No           | No              |
| E9Q800 Q3TEY5   | <i>Immt</i>         | K596       | 1.80         | No           | No              |
| P08249          | <i>Mdh2</i>         | K239       | 1.53         | Yes          | No              |
| P51667          | <i>Myl2</i>         | K165       | 1.64         | No           | No              |
| Q9CPP6          | <i>Ndufa5</i>       | K36        | 1.51         | No           | No              |
| Q91VD9 Q3TIU7   | <i>Ndufs1</i>       | K98        | 1.62         | No           | No              |
| P52503          | <i>Ndufs6</i>       | K41        | 1.58         | No           | Yes             |
| Q9JHW2          | <i>Nit2</i>         | K68        | -2.80        | No           | No              |
| Q60597          | <i>Ogdh</i>         | K897       | -1.52        | No           | No              |
| P35486          | <i>Pdha1</i>        | K321       | 1.76         | No           | No              |
| P35486          | <i>Pdha1</i>        | K63        | 1.65         | No           | No              |
| Q8K1R3 Q8K1R3-2 | <i>Pnpt1</i>        | K285       | 1.64         | No           | No              |
| Q3TST0 Q3UNL5   |                     |            |              |              |                 |
| Q3TN29          |                     |            |              |              |                 |
| Q8K2B3          | <i>Sdha</i>         | K608       | 2.07         | No           | Yes             |
| Q8VEM8 G5E902   | <i>Slc25a3</i>      | K230       | 2.41         | No           | No              |
| Q3THU8          |                     |            |              |              |                 |
| P51881          | <i>Slc25a5</i>      | K155       | 1.57         | No           | No              |
| Q9D855 Q9CQB4   | <i>Uqcrb</i>        | K110       | 1.59         | No           | No              |
| Q9D855 Q9CQB4   | <i>Uqcrb</i>        | K83        | -1.99        | No           | No              |

A fold-change cut-off of  $\pm 1.5$  was used for this analysis.



**Supplemental Table 5. Mitochondrial protein acetylation sites regulated in human failing hearts.**

| <b>Uniprot ID</b> | <b>Gene Symbol</b> | <b>Acetyl</b> | <b>DCM/NF ( FC)</b> | <b>p-value</b> |
|-------------------|--------------------|---------------|---------------------|----------------|
| Q9UKU7            | <i>ACAD8</i>       | K144          | 2.22                | 0.055          |
| P16219            | <i>ACADS</i>       | K343          | 2.04                | 0.059          |
| A2A274            | <i>ACO2</i>        | K50           | 1.35                | 0.021          |
| A2A274            | <i>ACO2</i>        | K138          | 2.03                | 0.022          |
| B7Z452            | <i>ACSL1</i>       | K561          | 1.83                | 0.059          |
| P30038            | <i>ALDH4A1</i>     | K531          | 2.01                | 0.013          |
| P30038            | <i>ALDH4A1</i>     | K119          | 1.99                | 0.042          |
| P30038            | <i>ALDH4A1</i>     | K93           | 1.52                | 0.169          |
| Q8NCW5            | <i>APOA1BP</i>     | K148          | 1.62                | 0.030          |
| Q6UXV4            | <i>APOOL</i>       | K105          | 2.46                | 0.033          |
| P25705            | <i>ATP5A1</i>      | K252          | 2.55                | 0.004          |
| P25705            | <i>ATP5A1</i>      | K498          | -1.62               | 0.007          |
| P25705            | <i>ATP5A1</i>      | K316          | 1.53                | 0.010          |
| P25705            | <i>ATP5A1</i>      | K194          | 1.82                | 0.038          |
| P25705            | <i>ATP5A1</i>      | K506          | 1.45                | 0.040          |
| P25705            | <i>ATP5A1</i>      | K531          | -1.62               | 0.186          |
| P25705            | <i>ATP5A1</i>      | K230          | 2.09                | 0.074          |
| O75947            | <i>ATP5H</i>       | K58           | 1.59                | 0.110          |
| P18859            | <i>ATP5J</i>       | K94           | 1.85                | 0.095          |
| Q9UII2            | <i>ATPIF1</i>      | K82           | 1.79                | 0.045          |
| Q02338            | <i>BDH1</i>        | K97           | 1.88                | 0.045          |
| Q02338            | <i>BDH1</i>        | K212          | 1.62                | 0.060          |
| P04040            | <i>CAT</i>         | K237          | 2.29                | 0.023          |
| Q03135            | <i>CAV1</i>        | K47           | 1.85                | 0.064          |
| Q9NZ45            | <i>CISD1</i>       | K68           | 2.05                | 0.001          |
| P12277            | <i>CKB</i>         | K307          | 3.76                | 0.002          |
| P12277            | <i>CKB</i>         | K298          | 1.67                | 0.088          |
| P17540            | <i>CKMT2</i>       | K230          | 1.67                | 0.001          |
| Q14061            | <i>COX17</i>       | K40           | 2.45                | 0.003          |
| P13073            | <i>COX4II</i>      | K159          | 1.97                | 0.040          |
| Q92523            | <i>CPT1B</i>       | K40           | 2.01                | 0.022          |
| P07339            | <i>CTSD</i>        | K341          | 2.01                | 0.063          |
| Q9UHQ9            | <i>CYB5R1</i>      | K167          | -1.23               | 0.018          |
| P11182            | <i>DBT</i>         | K295          | 1.60                | 0.255          |
| P11182            | <i>DBT</i>         | K243          | 2.01                | 0.071          |
| P11182            | <i>DBT</i>         | K257          | 2.03                | 0.153          |
| P36957            | <i>DLST</i>        | K267/K272     | 1.54                | 0.255          |
| P15924            | <i>DSP</i>         | K916          | 1.41                | 0.003          |
| P15924            | <i>DSP</i>         | K1687         | 2.04                | 0.012          |
| P15924            | <i>DSP</i>         | K485          | 1.91                | 0.039          |
| P15924            | <i>DSP</i>         | K1099         | 1.84                | 0.126          |
| P15924            | <i>DSP</i>         | K2393         | 1.84                | 0.095          |
| P30084            | <i>ECHS1</i>       | K115          | 1.70                | 0.056          |
| P13804            | <i>ETFA</i>        | K69           | 1.94                | 0.075          |
| Q16134            | <i>ETFDH</i>       | K96           | 1.60                | 0.025          |
| P00505            | <i>GOT2</i>        | K279          | 2.55                | 0.016          |
| P00505            | <i>GOT2</i>        | K94           | 2.19                | 0.024          |
| P40939            | <i>HADHA</i>       | K406          | -2.49               | 0.008          |
| P40939            | <i>HADHA</i>       | K353          | -1.67               | 0.135          |
| P40939            | <i>HADHA</i>       | K411          | -1.63               | 0.072          |
| P40939            | <i>HADHA</i>       | K326/K334     | 1.54                | 0.409          |
| P40939            | <i>HADHA</i>       | K605          | 2.45                | 0.064          |
| P49590            | <i>HARS2</i>       | K52           | 1.92                | 0.020          |
| P31937            | <i>HIBADH</i>      | K56           | 1.89                | 0.103          |
| O75874            | <i>IDH1</i>        | K81           | 2.28                | 0.018          |
| P50213            | <i>IDH3A</i>       | K223          | -1.82               | 0.008          |
| O43837            | <i>IDH3B</i>       | K199          | 3.74                | 0.002          |
| P83111            | <i>LACTB</i>       | K225          | 1.60                | 0.187          |
| P42704            | <i>LRPPRC</i>      | K66           | 2.37                | 0.038          |

|        |                |      |       |       |
|--------|----------------|------|-------|-------|
| Q9BQ69 | <i>MACROD1</i> | K117 | 1.53  | 0.007 |
| P21397 | <i>MAOA</i>    | K469 | 2.36  | 0.058 |
| P23368 | <i>ME2</i>     | K24  | -2.33 | 0.020 |
| P82909 | <i>MRPS36</i>  | K78  | 2.13  | 0.015 |
| Q9Y3D2 | <i>MSRB2</i>   | K176 | 2.38  | 0.038 |
| Q9UI09 | <i>NDUFA12</i> | K114 | 1.70  | 0.005 |
| Q9UI09 | <i>NDUFA12</i> | K47  | 1.72  | 0.169 |
| Q9P0J0 | <i>NDUFA13</i> | K22  | 2.05  | 0.288 |
| Q9P0J0 | <i>NDUFA13</i> | K7   | 2.80  | 0.105 |
| P56556 | <i>NDUFA6</i>  | K44  | 1.60  | 0.575 |
| P51970 | <i>NDUFA8</i>  | K106 | 3.13  | 0.005 |
| P51970 | <i>NDUFA8</i>  | K38  | 1.60  | 0.148 |
| Q16795 | <i>NDUFA9</i>  | K163 | 2.17  | 0.006 |
| O96000 | <i>NDUFB10</i> | K121 | 1.86  | 0.078 |
| O95298 | <i>NDUFC2</i>  | K114 | 1.59  | 0.002 |
| O75489 | <i>NDUFS3</i>  | K109 | 1.84  | 0.000 |
| O43920 | <i>NDUFS5</i>  | K38  | 1.63  | 0.008 |
| O43920 | <i>NDUFS5</i>  | K101 | 1.32  | 0.012 |
| O00217 | <i>NDUFS8</i>  | K88  | 2.00  | 0.037 |
| Q13423 | <i>NNT</i>     | K100 | 2.10  | 0.007 |
| Q13423 | <i>NNT</i>     | K331 | 1.58  | 0.009 |
| Q13423 | <i>NNT</i>     | K462 | 1.75  | 0.020 |
| Q13423 | <i>NNT</i>     | K453 | 2.32  | 0.030 |
| Q13423 | <i>NNT</i>     | K403 | 1.69  | 0.178 |
| E9PCR7 | <i>OGDH</i>    | K363 | 2.53  | 0.006 |
| E9PCR7 | <i>OGDH</i>    | K402 | 1.58  | 0.033 |
| E9PCR7 | <i>OGDH</i>    | K416 | -1.64 | 0.093 |
| E9PCR7 | <i>OGDH</i>    | K252 | 2.37  | 0.053 |
| P55809 | <i>OXCT1</i>   | K41  | 2.46  | 0.037 |
| P55809 | <i>OXCT1</i>   | K296 | 1.51  | 0.333 |
| P30405 | <i>PPIF</i>    | K73  | -1.81 | 0.018 |
| P30405 | <i>PPIF</i>    | K167 | 1.95  | 0.040 |
| P47897 | <i>QARS</i>    | K230 | 2.17  | 0.036 |
| Q9Y512 | <i>SAMM50</i>  | K227 | 1.34  | 0.012 |
| D6RFM5 | <i>SDHA</i>    | K361 | 1.64  | 0.018 |
| E9PEF8 | <i>SDHA</i>    | K396 | 1.52  | 0.020 |
| D6RFM5 | <i>SDHA</i>    | K179 | 1.84  | 0.130 |
| P12235 | <i>SLC25A4</i> | K163 | 1.67  | 0.003 |
| P12235 | <i>SLC25A4</i> | K33  | 1.81  | 0.013 |
| P12235 | <i>SLC25A4</i> | K96  | 1.53  | 0.051 |
| P53597 | <i>SUCLG1</i>  | K54  | 1.88  | 0.012 |
| P21980 | <i>TGM2</i>    | K672 | 2.51  | 0.001 |
| P49411 | <i>TUFM</i>    | K297 | 2.13  | 0.015 |
| P49411 | <i>TUFM</i>    | K55  | 1.78  | 0.101 |
| P31930 | <i>UQCRC1</i>  | K447 | 1.60  | 0.032 |
| P22695 | <i>UQCRC2</i>  | K159 | 1.35  | 0.043 |
| P07919 | <i>UQCRH</i>   | K85  | 1.85  | 0.002 |
| O14949 | <i>UQCRCQ</i>  | K33  | 1.90  | 0.040 |
| P21796 | <i>VDAC1</i>   | K224 | 1.20  | 0.018 |
| P21796 | <i>VDAC1</i>   | K109 | 1.23  | 0.019 |
| P21796 | <i>VDAC1</i>   | K252 | 1.74  | 0.022 |

A fold-change cut-off of  $\pm 1.5$  or  $p < 0.05$  was used for this analysis.
